# Supplementary material
Source: PubMed Central journal article supplement (PMC4491293)

**SUPPLEMENTAL MATERIAL****Table S1.** Hazard ratios (95% confidence intervals) for the association between  $\Delta$  pulse pressure categories (Reference:  $\geq -5$  to  $< 5$  mmHg) and all-cause mortality using time-varying Cox regression analyses without imputation of missing covariates

| $\Delta$ Pulse pressure (mmHg) | All-cause death hazard ratios (95% confidence intervals) |                                    |                                           |
|--------------------------------|----------------------------------------------------------|------------------------------------|-------------------------------------------|
|                                | Minimally SBP adjusted (n=98,577)                        | SBP & Case-mix adjusted (n=62,162) | SBP & Case-mix & MICS adjusted (n=57,681) |
| <-25                           | 1.26 (1.18-1.34)                                         | 1.06 (0.97-1.16)                   | 1.13 (1.01-1.27)                          |
| $\geq -25$ to <-15             | 1.00 (0.94-1.06)                                         | 0.93 (0.86-1.01)                   | 1.03 (0.93-1.14)                          |
| $\geq -15$ to <-5              | 0.95 (0.90-0.99)                                         | 0.92 (0.86-0.99)                   | 1.00 (0.91-1.08)                          |
| $\geq -5$ to <5                | Reference                                                | Reference                          | Reference                                 |
| 5 to <15                       | 1.13 (1.08-1.19)                                         | 1.04 (0.98-1.12)                   | 1.03 (0.95-1.12)                          |
| 15 to <25                      | 1.30 (1.23-1.37)                                         | 1.23 (1.13-1.33)                   | 1.16 (1.05-1.28)                          |
| $\geq 25$                      | 1.27 (1.18-1.35)                                         | 1.20 (1.09-1.32)                   | 1.17 (1.04-1.32)                          |
| $\Delta$ Pulse pressure (mmHg) | Minimally MAP adjusted (n=98,577)                        | MAP & Case-mix adjusted (n=62,162) | MAP & Case-mix & MICS adjusted (n=57,681) |
| <-25                           | 0.98 (0.92-1.04)                                         | 0.86 (0.79-0.94)                   | 0.98 (0.88-1.10)                          |
| $\geq -25$ to <-15             | 0.88 (0.83-0.93)                                         | 0.83 (0.77-0.90)                   | 0.95 (0.86-1.06)                          |
| $\geq -15$ to <-5              | 0.90 (0.85-0.94)                                         | 0.88 (0.82-0.94)                   | 0.96 (0.88-1.05)                          |
| $\geq -5$ to <5                | Reference                                                | Reference                          | Reference                                 |
| 5 to <15                       | 1.17 (1.11-1.22)                                         | 1.08 (1.01-1.15)                   | 1.05 (0.97-1.15)                          |
| 15 to <25                      | 1.37 (1.29-1.44)                                         | 1.30 (1.20-1.40)                   | 1.20 (1.09-1.33)                          |
| $\geq 25$                      | 1.39 (1.30-1.49)                                         | 1.33 (1.21-1.46)                   | 1.25 (1.11-1.41)                          |

*Note:* Minimally adjusted model included adjustment for entry calendar quarter, and pre-dialysis SBP or pre-dialysis MAP. Case-mix adjusted for covariates in the minimally adjusted model plus ultrafiltration percentage, age, sex, race/ethnicity, presence of diabetes mellitus, 9 pre-existing comorbidities, history of tobacco smoking, dialysis duration categories, primary insurance, types of vascular access, and dialysis dose as indicated by single pool Kt/V. Case-mix & MICS adjusted for all case-mix covariates plus body mass index, serum levels of albumin, creatinine, total iron-binding capacity, ferritin, calcium, phosphorus, bicarbonate, hemoglobin, blood white blood cells, and lymphocyte percentage.

*Abbreviations:* SBP, systolic blood pressure; MAP, mean arterial blood pressure; MICS, malnutrition-inflammation complex syndrome.

**Table S2.** Hazard ratios (95% confidence intervals) for the association between  $\Delta$  pulse pressure categories (Reference:  $\geq -5$  to  $< 5$  mmHg) and all-cause mortality using time-varying Cox regression analyses with inclusion of outliers ( $< 1^{\text{st}}$  and  $> 99^{\text{th}}$  percentiles) of  $\Delta$  pulse pressure

| $\Delta$ Pulse pressure (mmHg) | All-cause death hazard ratios (95% confidence intervals) |                                    |                                           |
|--------------------------------|----------------------------------------------------------|------------------------------------|-------------------------------------------|
|                                | Minimally SBP adjusted (n=99,044)                        | SBP & Case-mix adjusted (n=99,044) | SBP & Case-mix & MICS adjusted (n=99,044) |
| $< -25$                        | 1.31 (1.23-1.39)                                         | 1.16 (1.09-1.23)                   | 1.26 (1.18-1.34)                          |
| $\geq -25$ to $< -15$          | 1.00 (0.94-1.06)                                         | 0.94 (0.89-1.00)                   | 1.03 (0.98-1.10)                          |
| $\geq -15$ to $< -5$           | 0.94 (0.90-0.99)                                         | 0.93 (0.89-0.98)                   | 1.01 (0.96-1.06)                          |
| $\geq -5$ to $< 5$             | Reference                                                | Reference                          | Reference                                 |
| 5 to $< 15$                    | 1.13 (1.08-1.19)                                         | 1.11 (1.06-1.16)                   | 1.06 (1.01-1.11)                          |
| 15 to $< 25$                   | 1.30 (1.23-1.38)                                         | 1.25 (1.19-1.33)                   | 1.18 (1.11-1.24)                          |
| $\geq 25$                      | 1.30 (1.22-1.38)                                         | 1.22 (1.15-1.30)                   | 1.19 (1.12-1.26)                          |
| $\Delta$ Pulse pressure (mmHg) | Minimally MAP adjusted (n=99,044)                        | MAP & Case-mix adjusted (n=99,044) | MAP & Case-mix & MICS adjusted (n=99,044) |
| $< -25$                        | 1.00 (0.95-1.06)                                         | 0.92 (0.87-0.98)                   | 1.06 (1.00-1.12)                          |
| $\geq -25$ to $< -15$          | 0.88 (0.83-0.93)                                         | 0.84 (0.80-0.89)                   | 0.95 (0.90-1.01)                          |
| $\geq -15$ to $< -5$           | 0.90 (0.85-0.94)                                         | 0.89 (0.84-0.93)                   | 0.97 (0.92-1.01)                          |
| $\geq -5$ to $< 5$             | Reference                                                | Reference                          | Reference                                 |
| 5 to $< 15$                    | 1.17 (1.12-1.23)                                         | 1.15 (1.10-1.20)                   | 1.09 (1.04-1.14)                          |
| 15 to $< 25$                   | 1.37 (1.30-1.45)                                         | 1.33 (1.26-1.41)                   | 1.23 (1.16-1.30)                          |
| $\geq 25$                      | 1.46 (1.37-1.55)                                         | 1.39 (1.31-1.48)                   | 1.30 (1.23-1.38)                          |

*Note:* Minimally adjusted model included adjustment for entry calendar quarter, and pre-dialysis SBP or pre-dialysis MAP. Case-mix adjusted for covariates in the minimally adjusted model plus ultrafiltration percentage, age, sex, race/ethnicity, presence of diabetes mellitus, 9 pre-existing comorbidities, history of tobacco smoking, dialysis duration categories, primary insurance, types of vascular access, and dialysis dose as indicated by single pool Kt/V. Case-mix & MICS adjusted for all case-mix covariates plus body mass index, serum levels of albumin, creatinine, total iron-binding capacity, ferritin, calcium, phosphorus, bicarbonate, hemoglobin, blood white blood cells, and lymphocyte percentage.

*Abbreviations:* SBP, systolic blood pressure; MAP, mean arterial blood pressure; MICS, malnutrition-inflammation complex syndrome.

**Figure Legend****Figure S1:** Algorithm of study cohort creation.

*Abbreviations:* HD, hemodialysis; PP, pulse pressure.

**Figure S2:** SBP adjusted (A) and MAP adjusted (B) log hazard ratio (solid lines) and 95% confidence interval (dashed lines) of all-cause mortality associated with change in pulse pressure during hemodialysis using time-varying Cox regression analyses in 98,577 hemodialysis patients for case-mix adjusted models.

Case-mix adjusted models included adjustment for entry calendar quarter, pre-dialysis SBP (A) or pre-dialysis MAP (B), ultrafiltration percentage, age, sex, race/ethnicity, presence of diabetes mellitus, 9 pre-existing comorbidities, history of tobacco smoking, dialysis duration categories, primary insurance, types of vascular access, and dialysis dose as indicated by single pool Kt/V.

*Abbreviations:* SBP, systolic blood pressure; MAP, mean arterial blood pressure..

**Figure S3:** Association between change in pulse pressure during hemodialysis and cardiovascular mortality in 98,577 hemodialysis patients: (A) SBP & case-mix & MICS adjusted and (B) MAP & case-mix & MICS adjusted models. The solid lines and dashed lines represent log hazard ratio and 95% confidence interval, respectively.

The models were adjusted for entry calendar quarter, pre-dialysis SBP (A) or pre-dialysis MAP (B), ultrafiltration percentage, age, sex, race/ethnicity, presence of diabetes mellitus, 9 pre-existing comorbidities, history of tobacco smoking, dialysis duration categories, primary insurance, types of vascular access, dialysis dose as indicated by single pool Kt/V, body mass index, serum levels of albumin, creatinine, total iron-binding capacity, ferritin, calcium, phosphorus, bicarbonate, hemoglobin, blood white blood cells, and lymphocyte percentage.

*Abbreviations:* SBP, systolic blood pressure; MAP, mean arterial blood pressure; MICS, malnutrition-inflammation complex syndrome.

**Figure S4:** Adjusted log hazard ratio (solid lines) and 95% confidence interval (dashed lines) of all-cause mortality associated with change in pulse pressure during hemodialysis using time-varying Cox regression analyses in 98,577 hemodialysis patients in the two separate models: (A) pre-dialysis pulse pressure & case-mix & MICS adjusted and (B) post-dialysis pulse pressure & case-mix & MICS adjusted models.

In addition to pre-dialysis pulse pressure (A) or post-dialysis pulse pressure (B), each model was adjusted for entry calendar quarter, ultrafiltration percentage, age, sex, race/ethnicity, presence of diabetes mellitus, 9 pre-existing comorbidities, history of tobacco smoking, dialysis duration categories, primary insurance, types of vascular access, dialysis dose as indicated by single pool Kt/V, body mass index, serum levels of albumin, creatinine, total iron-binding capacity, ferritin, calcium, phosphorus, bicarbonate, hemoglobin, blood white blood cells, and lymphocyte percentage.

*Abbreviations:* MICS, malnutrition-inflammation complex syndrome.

124,277 patients 18-99 years old receiving HD treatments more than 90 days

24,545 patients with missing all blood pressure measures were excluded.

99,732 patients

481 patients with blood pressure values <0.25<sup>th</sup> or >99.75<sup>th</sup> percentiles were excluded.

99,251 patients

207 patients with pulse pressure values <0.25<sup>th</sup> or >99.75<sup>th</sup> percentiles were excluded.

99,044 patients

467 patients with PP-difference values <1<sup>st</sup> or >99<sup>th</sup> percentiles were excluded.

98,577 patients for PP-difference analysis

**A**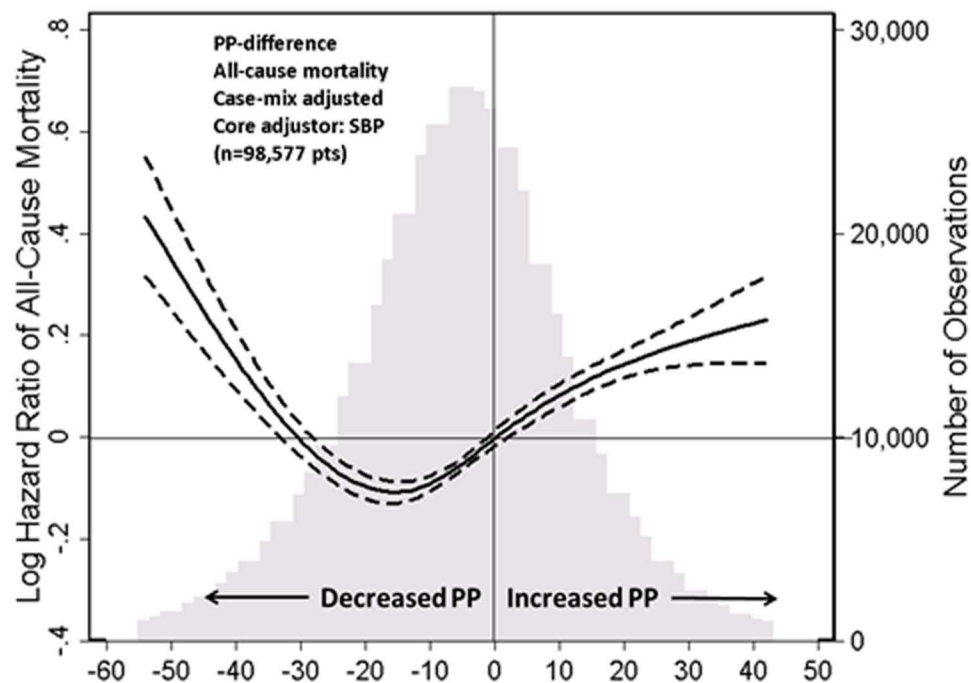**B**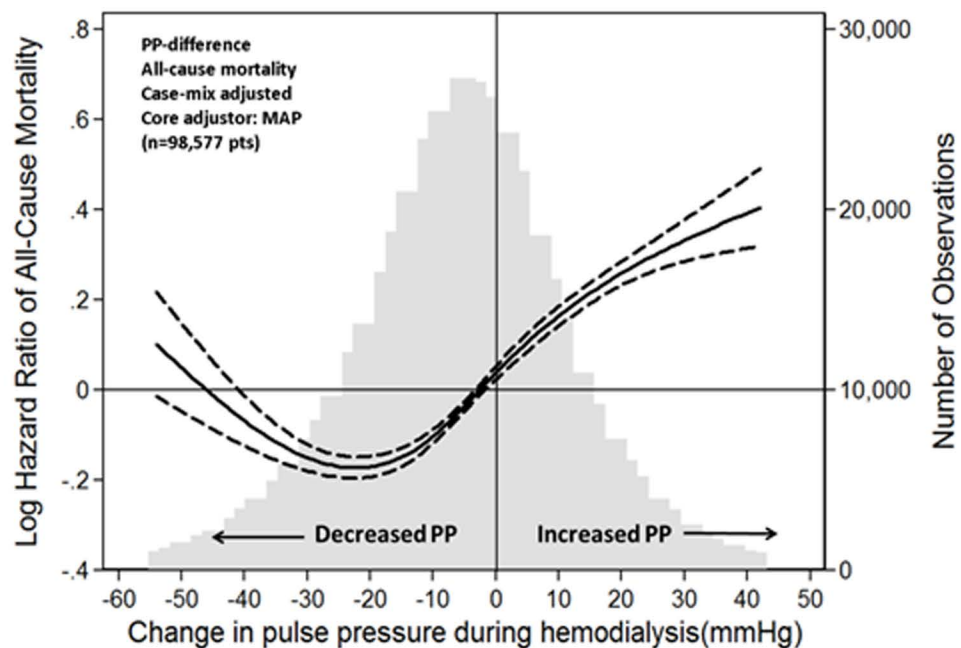

**A**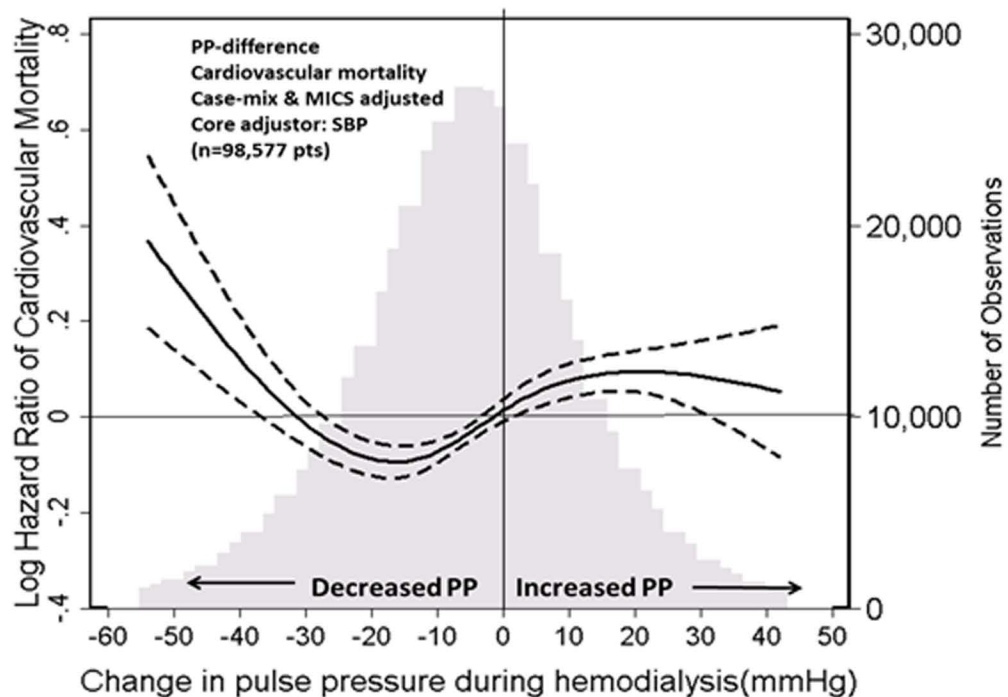**B**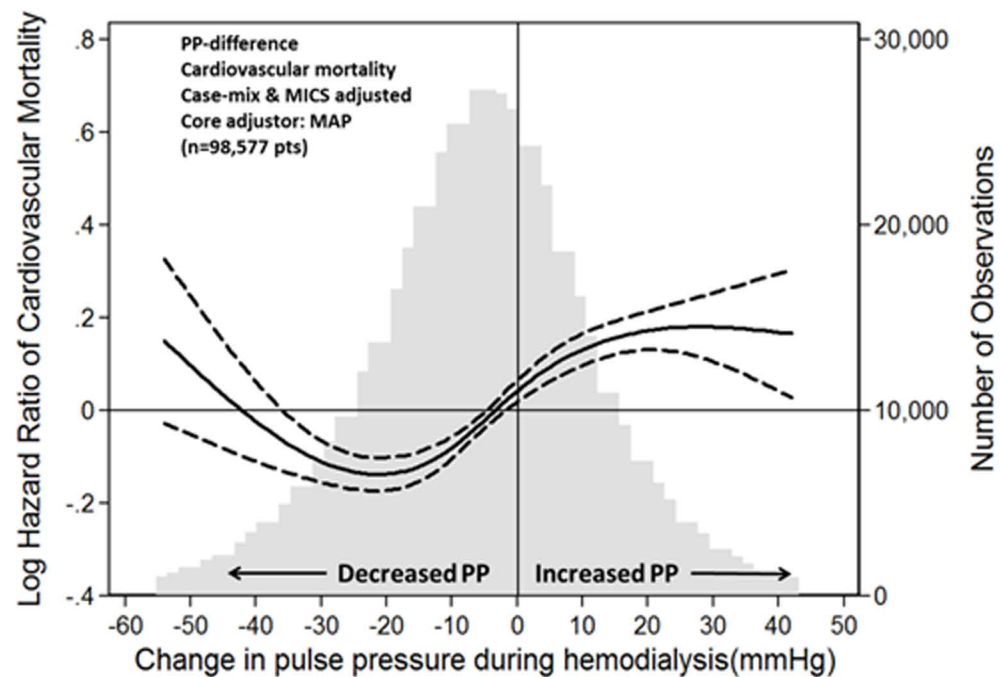

**A**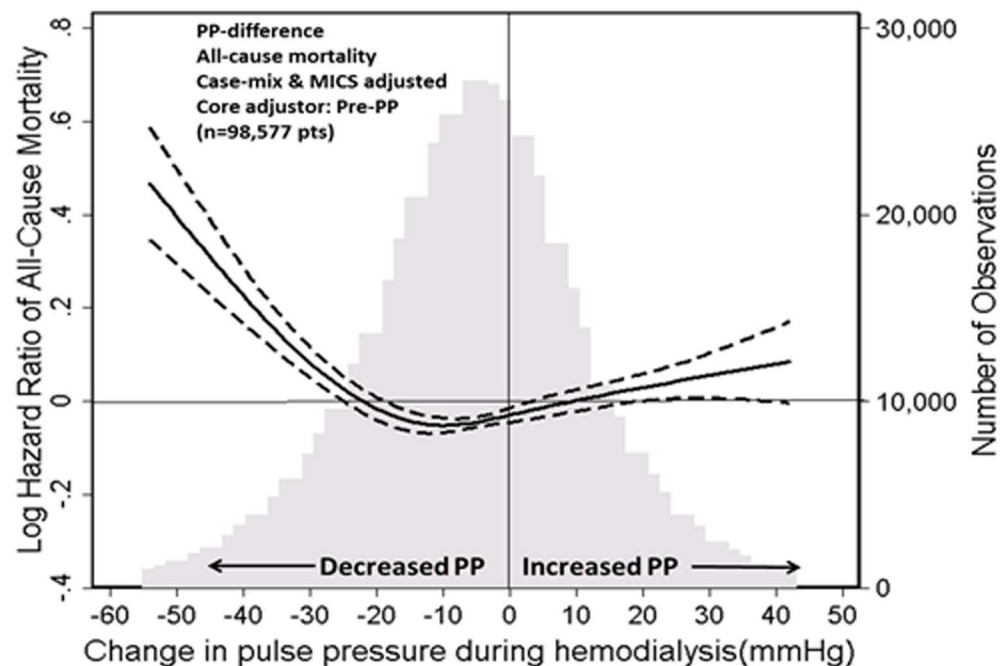**B**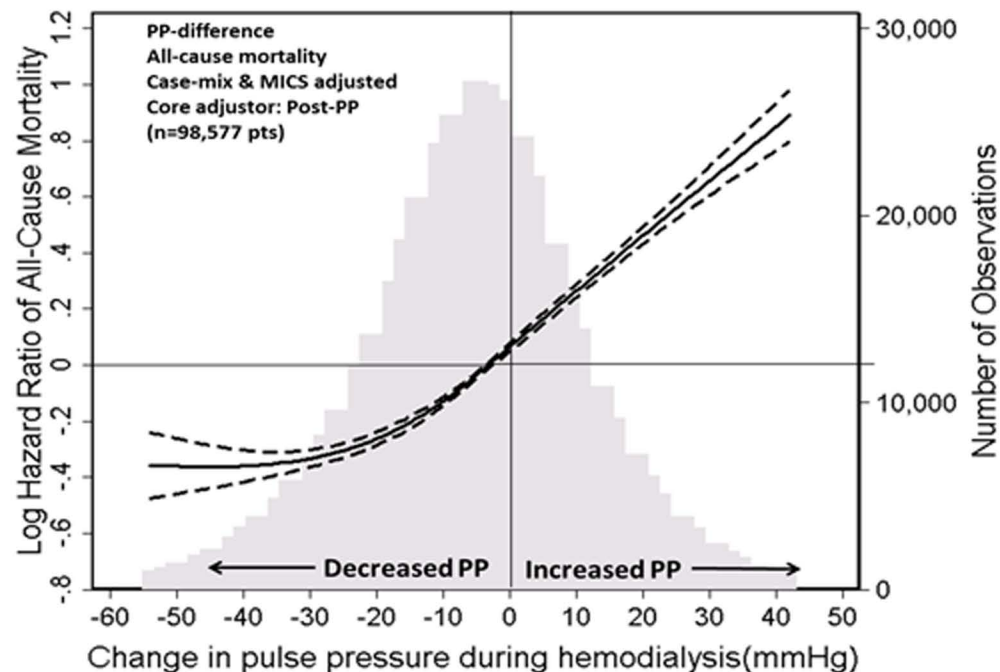

Supplement: CJN.09000914_CJN09000914SupplementaryData.pdf [file CJN.09000914_CJN09000914SupplementaryData.pdf]
